# Supplementary material for: The underlying molecular mechanisms and prognostic factors of RNA binding protein in colorectal cancer: a study based on multiple online databases
Source: Cancer Cell Int. 2021 Jun 30;21:325. doi: 10.1186/s12935-021-02031-6 (PMC8244213; doi:10.1186/s12935-021-02031-6)
Supplement: Supplementary file 8 — Additional file 8. The expression data of five RBP signatures in various CRC cell lines from the CCLE platform. [file 12935_2021_2031_MOESM8_ESM.xls]

## Sheet: CAPRIN2
Gene			CAPRIN2
C2BBE1			1.66549
CACO2	Primary colon	Colon cancer	2.22593
CAR1
CCK81			1.99238
CL11			3.42159
CL14			0.681994
CL34			2.27731
CL40			-0.366456
COLO201	Ascites metastases	Ducks D stage Colon cancer	1.40395
COLO205	Ascites metastases	Ducks D stage Colon cancer
COLO320	Primary colon	Ducks C stage Colon cancer	3.57506
COLO678			2.62558
CW2			0.212771
DIFI
DLD1
GEO
GP2D			2.80315
GP5D
HCC2998
HCC56			1.17366
HCT116	Primary colon	Colon cancer	2.36985
HCT15	Primary colon	Ducks C stage Colon cancer	1.8446
HCT8	Primary colon	Ileocecal colorectal adenocarcinoma
HRT18
HS255T			2.10395
HS675T			2.04482
HS698T			3.85826
HT115			1.81801
HT29	Primary colon	TNM I stage Colon cancer	2.39354
HT55			0.119614
KM12			4.93528
LIM1215
LOVO	Left supraclavicular metastases	TNM IV stage Colon cancer	3.16471
LS1034			4.2784
LS123	Primary colon	Ducks B stage Colon cancer	2.57959
LS180			2.75883
LS411N	Primary cecum	Ducks B stage Poorly differentiated cecal cancer	3.12727
LS513	Primary cecum	Ducks C stage Cecal cancer	2.53789
MDST8			1.1516
NCIH508	Abdominal wall metastases	Cecal cancer	2.86874
NCIH630
NCIH716	Ascites metastases	Poorly differentiated cecal cancer	5.02661
NCIH747	Intestinal nodule metastases	Cecal cancer	2.67387
OUMS23			0.807308
RCM1			1.19898
RKO			6.75023
SKCO1			4.07799
SNU1033			0.306787
SNU1040			1.44823
SNU1197			2.76704
SNU175			1.75954
SNU283			0.850173
SNU407			1.5934
SNU503			0.654882
SNU61			-0.085533
SNU81			2.00322
SNUC1			0.890137
SNUC2A	Primary cecum		2.43866
SNUC2B
SNUC4			1.27816
SNUC5			4.75128
SW1116	Primary colon	TNM III stage Colon cancer	1.60796
SW1417	Primary colon	TNM III stage Colon cancer	2.72963
SW1463	Primary colon	TNM II-III stage Colon cancer	1.29932
SW403	Primary colon	TNM III stage Colon cancer	1.60339
SW48	Primary colon	TNM IV stage Colon cancer	2.84708
SW480	Primary colon	Ducks B stage Colon cancer	1.51945
SW620	Lymph node metastasis	Ducks C stage Colon cancer	1.65775
SW837	Primary colon	TNM IV stage Rectal cancer	2.22763
SW948			2.17076
T84	Pulmonary metastases	Colon cancer	3.09653

## Sheet: GSPT1
Gene			GSPT1
C2BBE1			5.23946
CACO2	Primary colon	Colon cancer	4.75761
CAR1
CCK81			4.17367
CL11			5.09119
CL14			4.09104
CL34			4.61975
CL40			4.75731
COLO201	Ascites metastases	Ducks D stage Colon cancer	4.7751
COLO205	Ascites metastases	Ducks D stage Colon cancer
COLO320	Primary colon	Ducks C stage Colon cancer	5.0811
COLO678			4.01233
CW2			4.62878
DIFI
DLD1
GEO
GP2D			4.98238
GP5D
HCC2998
HCC56			5.40224
HCT116	Primary colon	Colon cancer	5.26441
HCT15	Primary colon	Ducks C stage Colon cancer	5.6745
HCT8	Primary colon	Ileocecal colorectal adenocarcinoma
HRT18
HS255T			3.65261
HS675T			4.05608
HS698T			4.01116
HT115			5.02732
HT29	Primary colon	TNM I stage Colon cancer	5.09368
HT55			5.28898
KM12			4.02918
LIM1215
LOVO	Left supraclavicular metastases	TNM IV stage Colon cancer	5.02683
LS1034			5.14465
LS123	Primary colon	Ducks B stage Colon cancer	4.44362
LS180			4.73148
LS411N	Primary cecum	Ducks B stage Poorly differentiated cecal cancer	4.36189
LS513	Primary cecum	Ducks C stage Cecal cancer	4.63018
MDST8			3.95769
NCIH508	Abdominal wall metastases	Cecal cancer	4.4261
NCIH630
NCIH716	Ascites metastases	Poorly differentiated cecal cancer	5.53246
NCIH747	Intestinal nodule metastases	Cecal cancer	5.20662
OUMS23			4.88867
RCM1			4.22761
RKO			3.89318
SKCO1			4.46926
SNU1033			4.6094
SNU1040			5.30079
SNU1197			4.57119
SNU175			5.04636
SNU283			5.27487
SNU407			4.35298
SNU503			4.56673
SNU61			5.13916
SNU81			3.98716
SNUC1			5.04621
SNUC2A	Primary cecum		4.18514
SNUC2B
SNUC4			5.28166
SNUC5			4.56122
SW1116	Primary colon	TNM III stage Colon cancer	4.5489
SW1417	Primary colon	TNM III stage Colon cancer	4.62207
SW1463	Primary colon	TNM II-III stage Colon cancer	5.01625
SW403	Primary colon	TNM III stage Colon cancer	5.16107
SW48	Primary colon	TNM IV stage Colon cancer	5.06925
SW480	Primary colon	Ducks B stage Colon cancer	4.26598
SW620	Lymph node metastasis	Ducks C stage Colon cancer	5.05802
SW837	Primary colon	TNM IV stage Rectal cancer	5.04262
SW948			4.31678
T84	Pulmonary metastases	Colon cancer	5.26145

## Sheet: CCAR2
Gene			CCAR2
C2BBE1			5.40858
CACO2	Primary colon	Colon cancer	5.25423
CAR1
CCK81			5.779
CL11			5.18275
CL14			4.81276
CL34			5.08998
CL40			4.9835
COLO201	Ascites metastases	Ducks D stage Colon cancer	5.00004
COLO205	Ascites metastases	Ducks D stage Colon cancer
COLO320	Primary colon	Ducks C stage Colon cancer	4.97256
COLO678			5.42511
CW2			5.74695
DIFI
DLD1
GEO
GP2D			5.50066
GP5D
HCC2998
HCC56			4.45828
HCT116	Primary colon	Colon cancer	5.70865
HCT15	Primary colon	Ducks C stage Colon cancer	5.41661
HCT8	Primary colon	Ileocecal colorectal adenocarcinoma
HRT18
HS255T			3.8026
HS675T			4.26712
HS698T			3.8676
HT115			5.00096
HT29	Primary colon	TNM I stage Colon cancer	3.76886
HT55			4.49034
KM12			4.39326
LIM1215
LOVO	Left supraclavicular metastases	TNM IV stage Colon cancer	4.29081
LS1034			5.03663
LS123	Primary colon	Ducks B stage Colon cancer	4.12773
LS180			5.42475
LS411N	Primary cecum	Ducks B stage Poorly differentiated cecal cancer	5.23973
LS513	Primary cecum	Ducks C stage Cecal cancer	5.24716
MDST8			5.77833
NCIH508	Abdominal wall metastases	Cecal cancer	4.62223
NCIH630
NCIH716	Ascites metastases	Poorly differentiated cecal cancer	4.64524
NCIH747	Intestinal nodule metastases	Cecal cancer	4.57693
OUMS23			4.06904
RCM1			3.92434
RKO			5.14271
SKCO1			4.39695
SNU1033			4.47568
SNU1040			5.42162
SNU1197			4.00723
SNU175			4.42585
SNU283			4.40772
SNU407			5.77024
SNU503			4.58743
SNU61			3.53551
SNU81			4.93516
SNUC1			4.83328
SNUC2A	Primary cecum		4.35388
SNUC2B
SNUC4			5.30273
SNUC5			4.98266
SW1116	Primary colon	TNM III stage Colon cancer	3.12522
SW1417	Primary colon	TNM III stage Colon cancer	3.88203
SW1463	Primary colon	TNM II-III stage Colon cancer	4.47348
SW403	Primary colon	TNM III stage Colon cancer	4.7005
SW48	Primary colon	TNM IV stage Colon cancer	4.78682
SW480	Primary colon	Ducks B stage Colon cancer	4.09783
SW620	Lymph node metastasis	Ducks C stage Colon cancer	5.67175
SW837	Primary colon	TNM IV stage Rectal cancer	4.25383
SW948			5.03762
T84	Pulmonary metastases	Colon cancer	4.34091

## Sheet: MRPS18C
Gene			MRPS18C
C2BBE1			4.51066
CACO2	Primary colon	Colon cancer	5.01988
CAR1
CCK81			4.68237
CL11			4.75848
CL14			4.30063
CL34			4.8424
CL40			4.70319
COLO201	Ascites metastases	Ducks D stage Colon cancer	5.39692
COLO205	Ascites metastases	Ducks D stage Colon cancer
COLO320	Primary colon	Ducks C stage Colon cancer	4.86315
COLO678			3.07982
CW2			5.12364
DIFI
DLD1
GEO
GP2D			5.02229
GP5D
HCC2998
HCC56			4.40962
HCT116	Primary colon	Colon cancer	4.93111
HCT15	Primary colon	Ducks C stage Colon cancer	5.1098
HCT8	Primary colon	Ileocecal colorectal adenocarcinoma
HRT18
HS255T			3.51323
HS675T			4.12397
HS698T			3.63591
HT115			4.38797
HT29	Primary colon	TNM I stage Colon cancer	4.87416
HT55			4.39099
KM12			5.62422
LIM1215
LOVO	Left supraclavicular metastases	TNM IV stage Colon cancer	4.64026
LS1034			4.79851
LS123	Primary colon	Ducks B stage Colon cancer	4.74071
LS180			4.71895
LS411N	Primary cecum	Ducks B stage Poorly differentiated cecal cancer	4.53803
LS513	Primary cecum	Ducks C stage Cecal cancer	4.73491
MDST8			4.54534
NCIH508	Abdominal wall metastases	Cecal cancer	3.82949
NCIH630
NCIH716	Ascites metastases	Poorly differentiated cecal cancer	4.8456
NCIH747	Intestinal nodule metastases	Cecal cancer	4.54498
OUMS23			4.32144
RCM1			3.70233
RKO			6.14666
SKCO1			4.55824
SNU1033			4.84074
SNU1040			4.90488
SNU1197			5.10035
SNU175			4.22299
SNU283			4.23464
SNU407			4.80932
SNU503			4.6859
SNU61			4.96305
SNU81			4.83666
SNUC1			4.60634
SNUC2A	Primary cecum		4.97514
SNUC2B
SNUC4			4.91296
SNUC5			4.27647
SW1116	Primary colon	TNM III stage Colon cancer	3.95483
SW1417	Primary colon	TNM III stage Colon cancer	4.41628
SW1463	Primary colon	TNM II-III stage Colon cancer	4.40661
SW403	Primary colon	TNM III stage Colon cancer	4.50397
SW48	Primary colon	TNM IV stage Colon cancer	4.22613
SW480	Primary colon	Ducks B stage Colon cancer	6.16918
SW620	Lymph node metastasis	Ducks C stage Colon cancer	5.5198
SW837	Primary colon	TNM IV stage Rectal cancer	4.95135
SW948			3.98199
T84	Pulmonary metastases	Colon cancer	4.80947

## Sheet: RPL3L
Gene			RPL3L
C2BBE1			-4.26279
CACO2	Primary colon	Colon cancer	-3.99581
CAR1
CCK81			-2.55865
CL11			-3.60057
CL14			-5.18035
CL34			-4.04958
CL40			-5.18663
COLO201	Ascites metastases	Ducks D stage Colon cancer	-5.46752
COLO205	Ascites metastases	Ducks D stage Colon cancer
COLO320	Primary colon	Ducks C stage Colon cancer	-0.287544
COLO678			-5.11491
CW2			-3.0035
DIFI
DLD1
GEO
GP2D			-3.70414
GP5D
HCC2998
HCC56			-2.88286
HCT116	Primary colon	Colon cancer	-5.48442
HCT15	Primary colon	Ducks C stage Colon cancer	-4.60703
HCT8	Primary colon	Ileocecal colorectal adenocarcinoma
HRT18
HS255T			-7.46489
HS675T			-5.79327
HS698T			-7.20226
HT115			-3.89987
HT29	Primary colon	TNM I stage Colon cancer	-4.43459
HT55			-3.08105
KM12			-2.84953
LIM1215
LOVO	Left supraclavicular metastases	TNM IV stage Colon cancer	-3.69591
LS1034			-2.51575
LS123	Primary colon	Ducks B stage Colon cancer	-4.10782
LS180			-4.93982
LS411N	Primary cecum	Ducks B stage Poorly differentiated cecal cancer	-3.0382
LS513	Primary cecum	Ducks C stage Cecal cancer	-5.69569
MDST8			-5.58111
NCIH508	Abdominal wall metastases	Cecal cancer	-5.37434
NCIH630
NCIH716	Ascites metastases	Poorly differentiated cecal cancer	-2.88459
NCIH747	Intestinal nodule metastases	Cecal cancer	-6.77379
OUMS23			0.770417
RCM1			-3.39196
RKO			-5.70325
SKCO1			-5.34802
SNU1033			-2.27517
SNU1040			-2.10273
SNU1197			-5.26272
SNU175			-4.39906
SNU283			-4.3386
SNU407			-4.54578
SNU503			-3.0228
SNU61			-4.86972
SNU81			-13
SNUC1			-5.06055
SNUC2A	Primary cecum		-3.41489
SNUC2B
SNUC4			-3.52597
SNUC5			-3.70598
SW1116	Primary colon	TNM III stage Colon cancer	-2.04572
SW1417	Primary colon	TNM III stage Colon cancer	-4.09372
SW1463	Primary colon	TNM II-III stage Colon cancer	-6.9112
SW403	Primary colon	TNM III stage Colon cancer	-2.42264
SW48	Primary colon	TNM IV stage Colon cancer	-3.4675
SW480	Primary colon	Ducks B stage Colon cancer	-3.61436
SW620	Lymph node metastasis	Ducks C stage Colon cancer	-2.48951
SW837	Primary colon	TNM IV stage Rectal cancer	-1.65889
SW948			-3.5989
T84	Pulmonary metastases	Colon cancer	-4.52463
